# Supplementary material for: A novel ionic liquid immobilized on FSM-16: a novel recoverable nanocatalyst for the synthesis of biscoumarin derivatives
Source: Royal Society of Chemistry journal article supplement (doi:10.1039/d3nj04796b), 2023-12-06
Supplement: d3nj04796b1.pdf [file d3nj04796b1.pdf]

## Supporting Information

### Novel ionic liquid immobilized on FSM-16: A novel recoverable nanocatalyst for the synthesis of biscoumarins

Azar Jahanbakhshi, Sanaz Eskandari and Mahnaz Farahi\*

Department of Chemistry, Yasouj University, P. O. Box 353, Yasouj 75918-74831, Iran

\*Corresponding author: E-mail: [farahimb@yu.ac.ir](mailto:farahimb@yu.ac.ir)

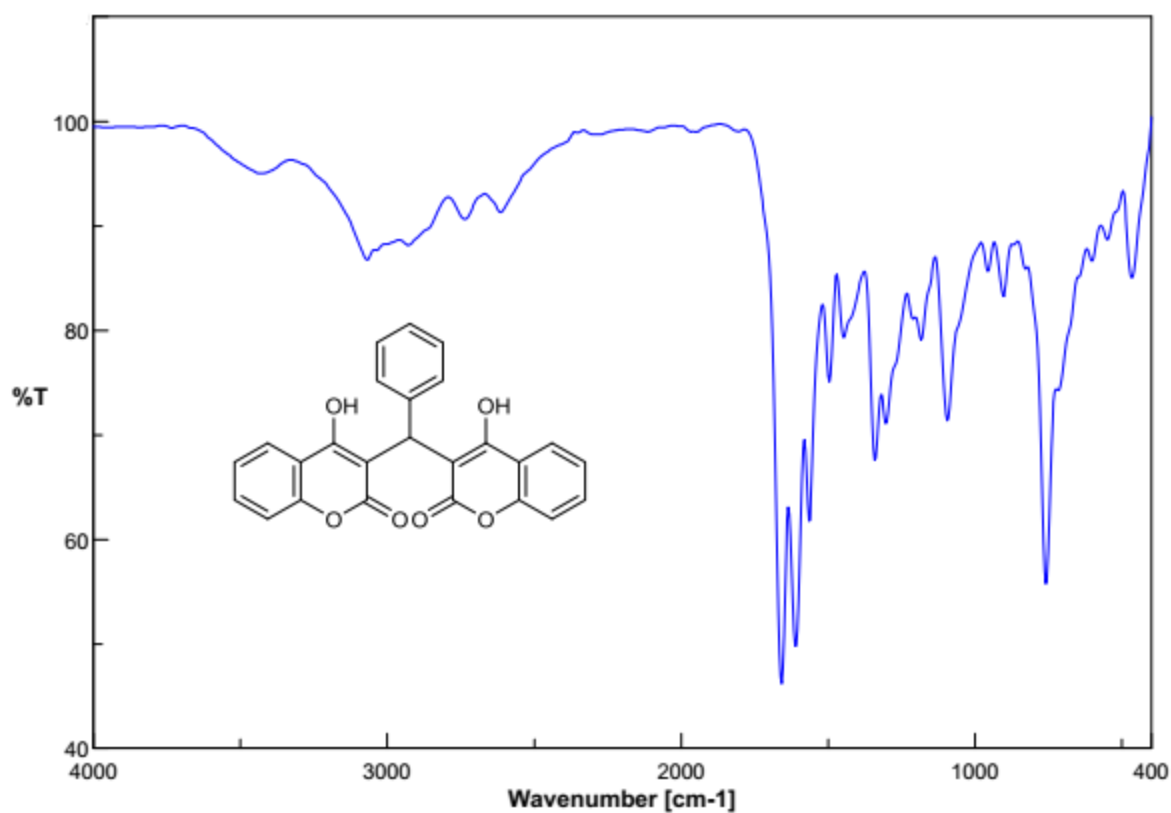

FT-IR spectrum of 3,3'-(phenylmethylene)bis(4-hydroxy-2H-chromen-2-one) (**4a**).

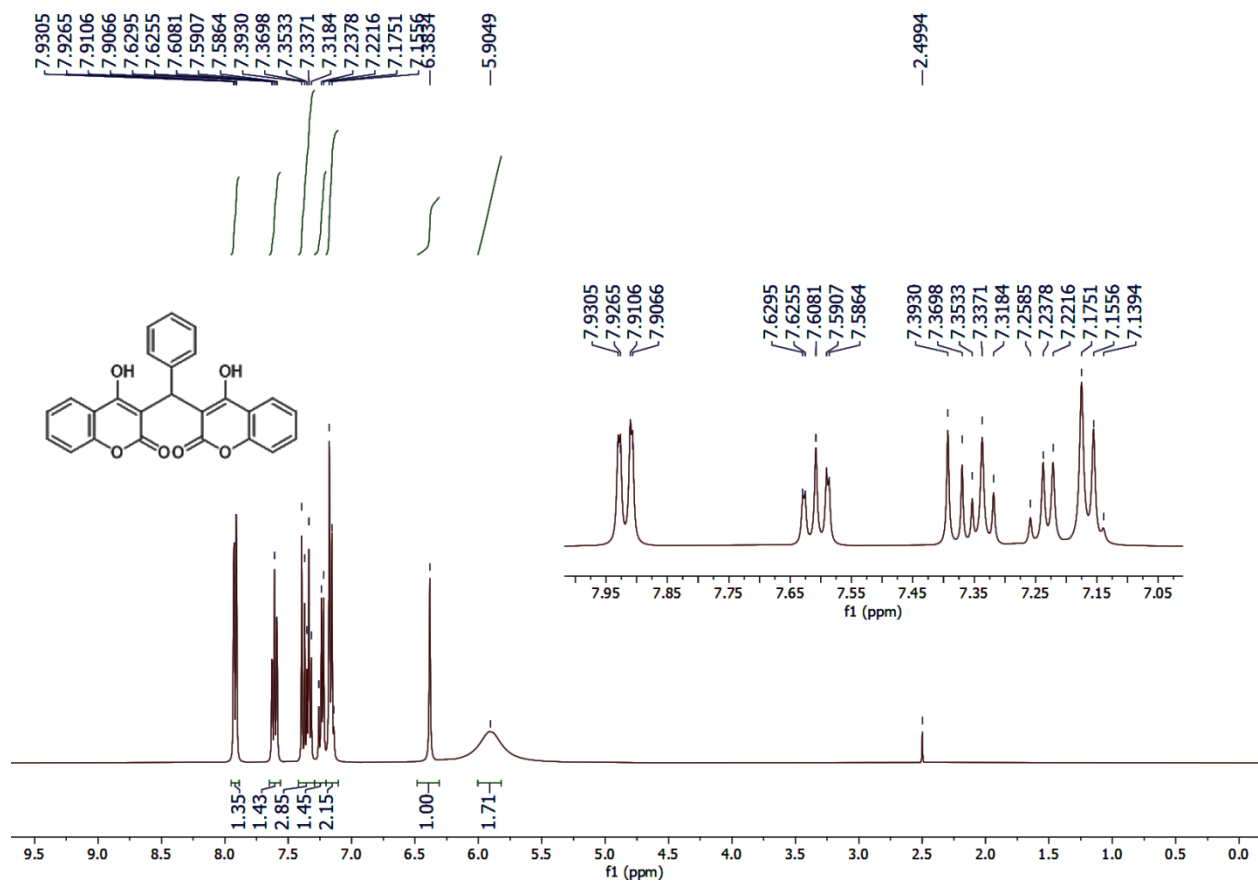

<sup>1</sup>H NMR spectrum of 3,3'-(phenylmethylene)bis(4-hydroxy-2H-chromen-2-one) (**4a**).

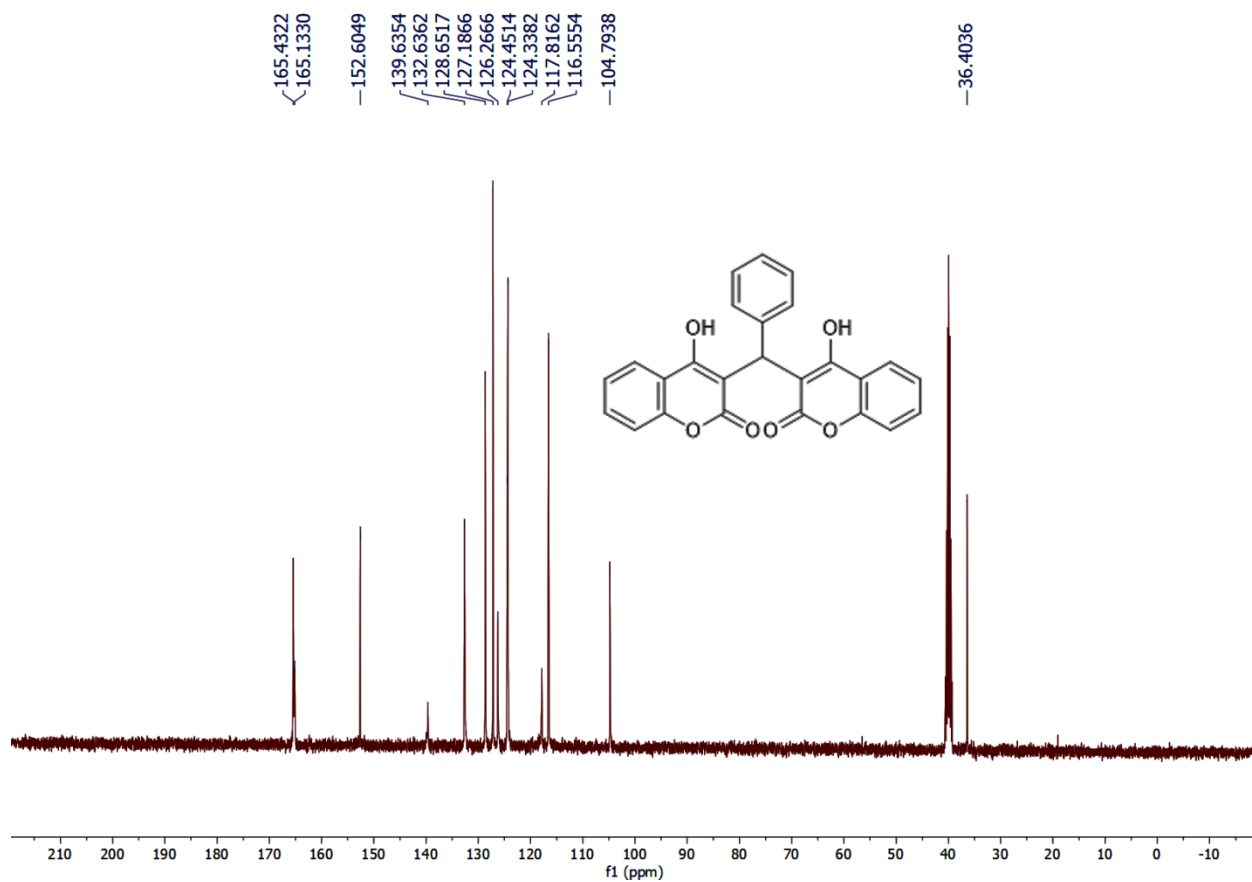

$^{13}\text{C}$  NMR spectrum of 3,3'-(phenylmethylene)bis(4-hydroxy-2H-chromen-2-one) (**4a**).

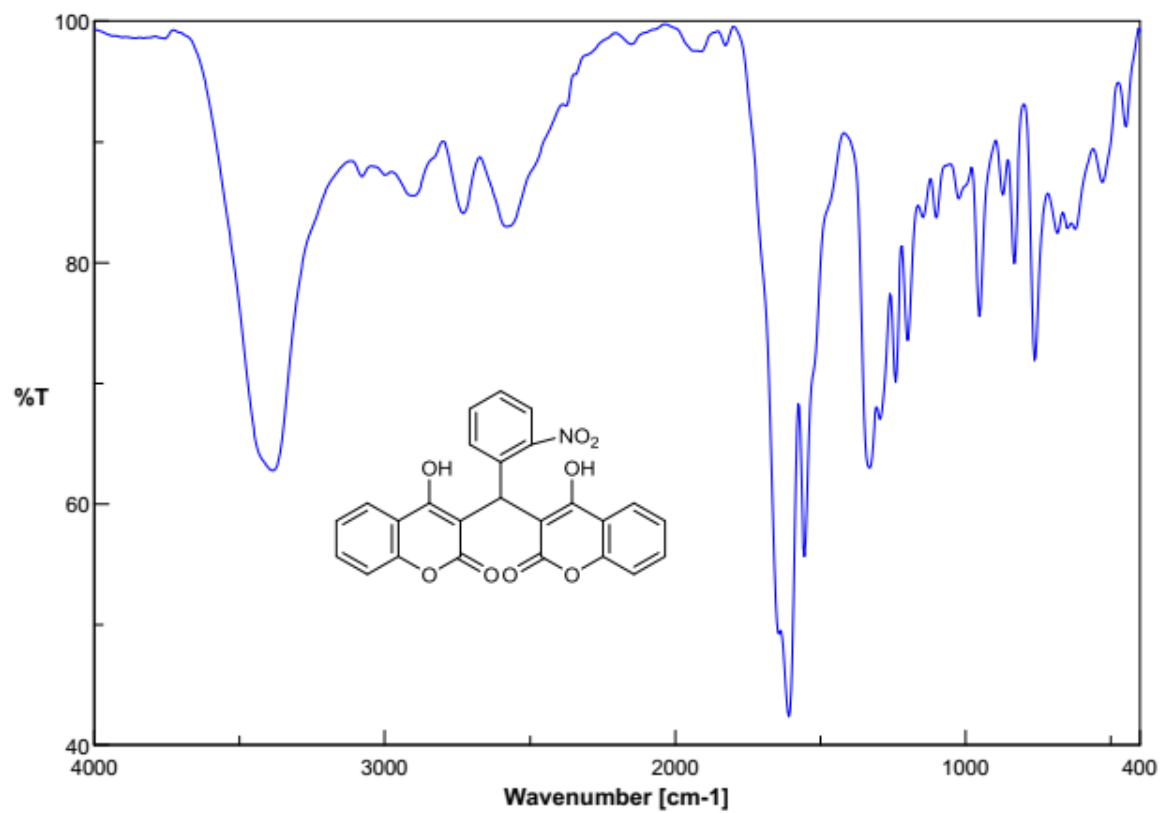

FT-IR spectrum of 3,3'-((2-nitrophenyl)methylene)bis(4-hydroxy-2H-chromen-2-one) (**4b**).

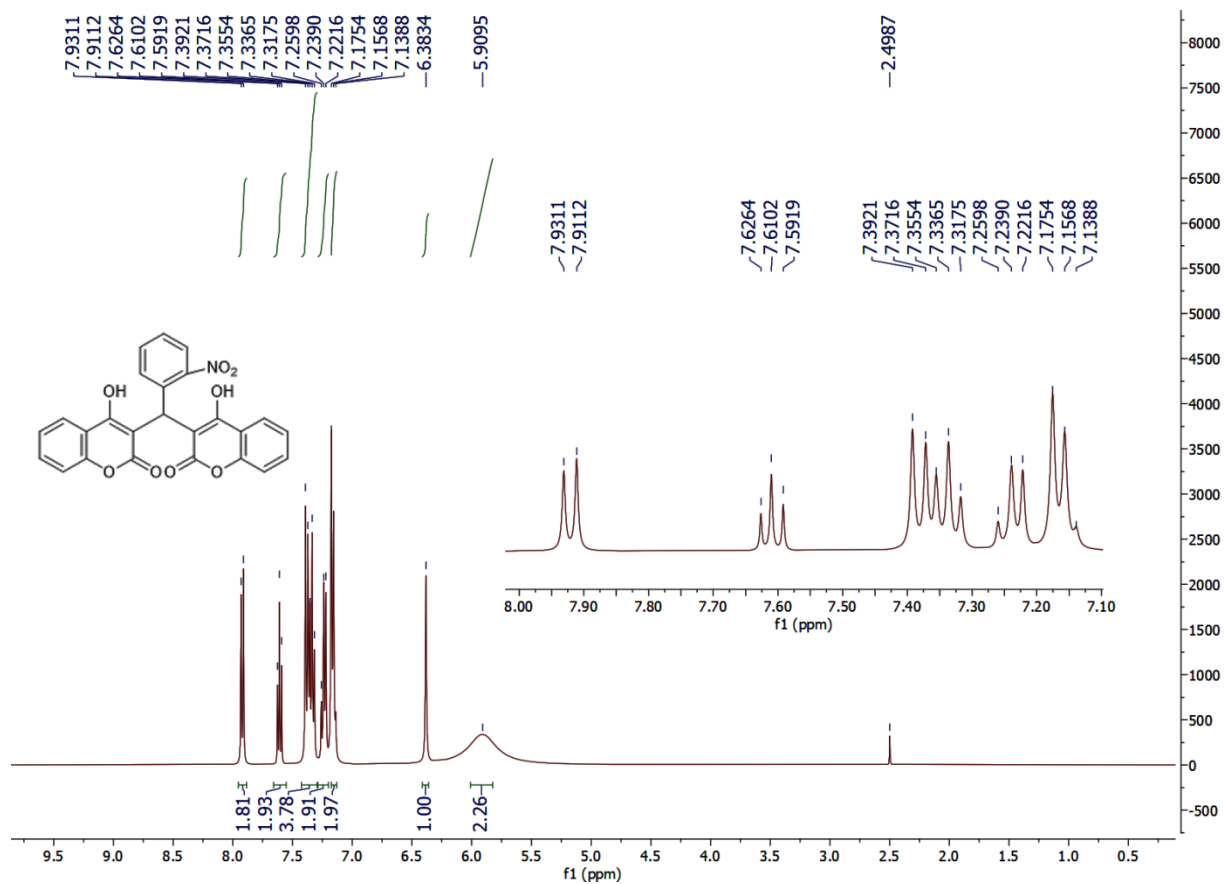

<sup>1</sup>H NMR spectrum of 3,3'-((2-nitrophenyl)methylene)bis(4-hydroxy-2H-chromen-2-one) (**4b**).

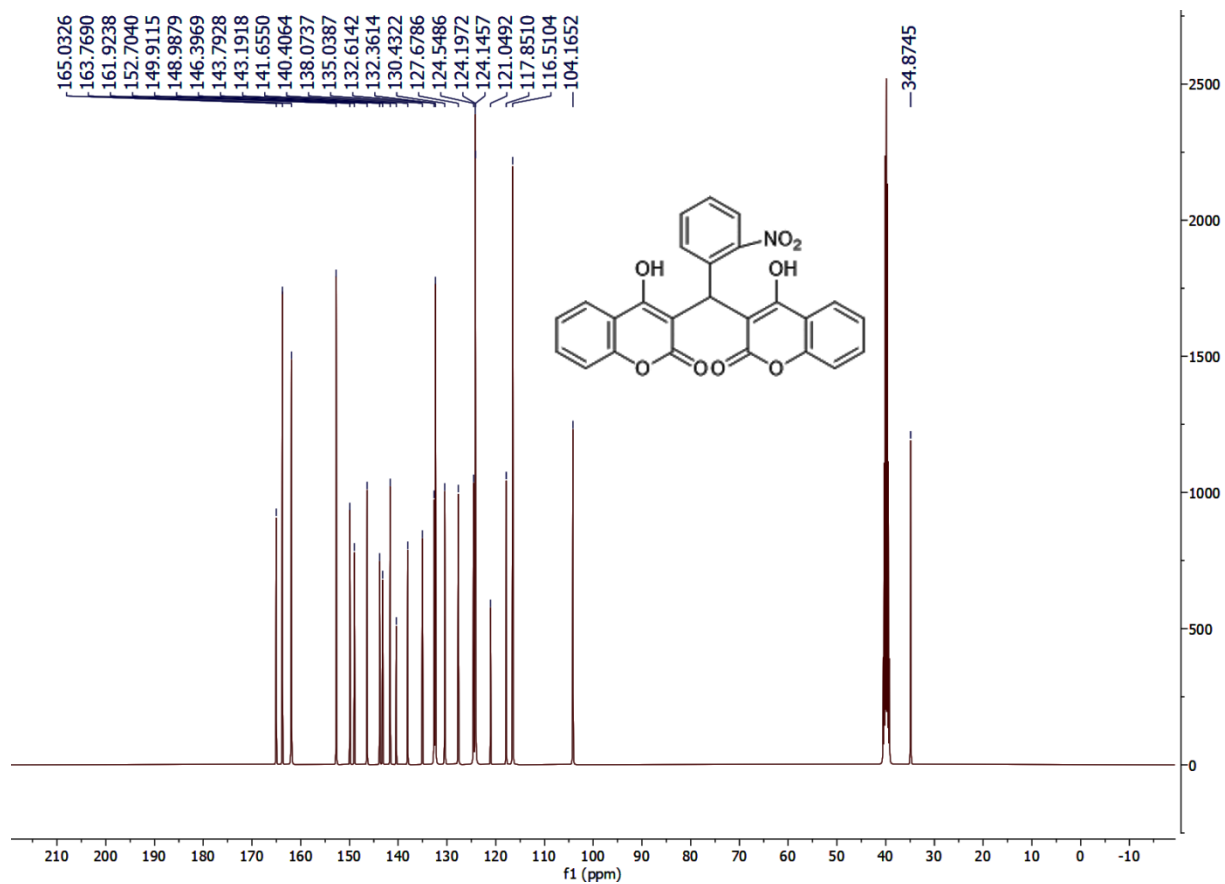

$^{13}\text{C}$  NMR spectrum of 3,3'-((2-nitrophenyl)methylene)bis(4-hydroxy-2H-chromen-2-one) (**4b**).

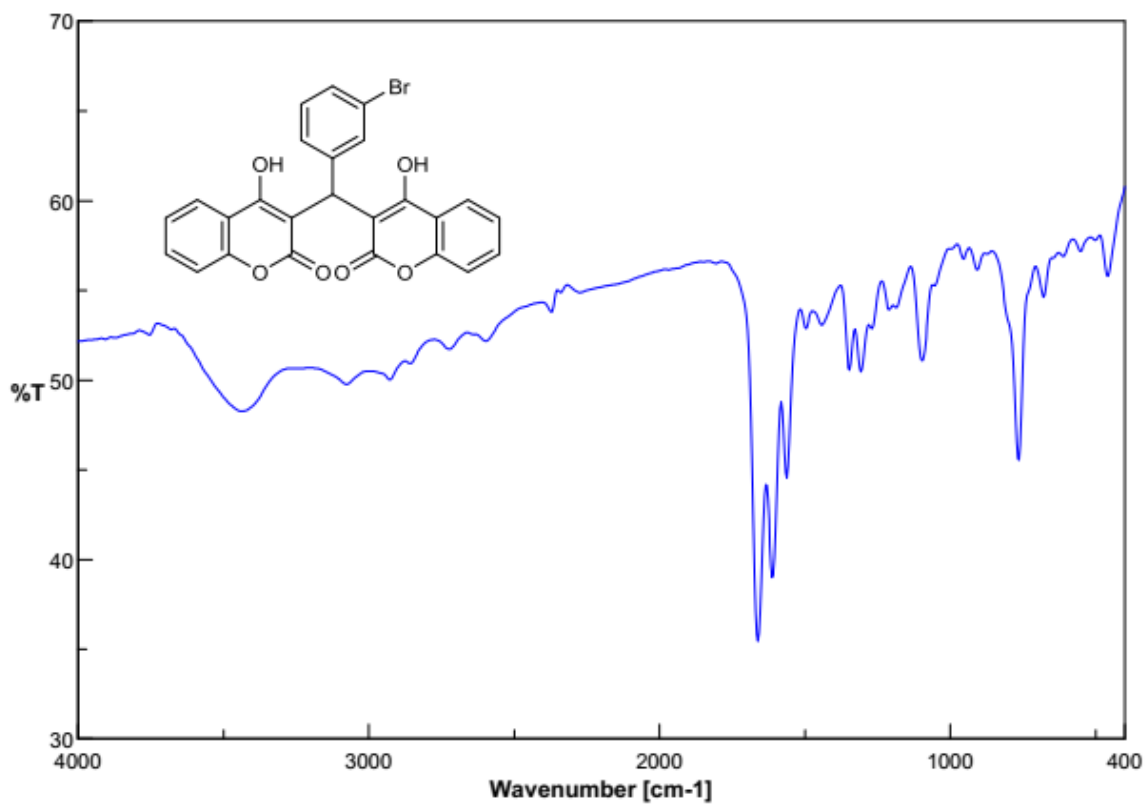

FT-IR spectrum of 3,3'-((3-bromophenyl)methylene)bis(4-hydroxy-2H-chromen-2-one) (**4c**).

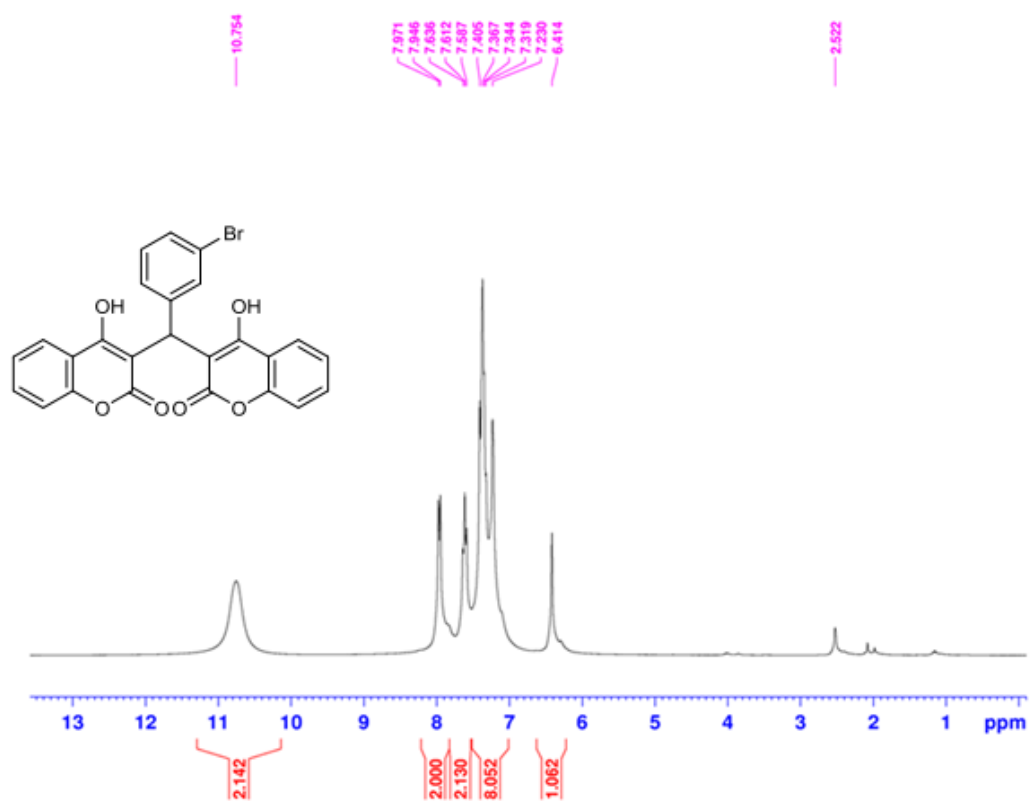

<sup>1</sup>H NMR spectrum of 3,3'-((3-bromophenyl)methylene)bis(4-hydroxy-2H-chromen-2-one) (**4c**).



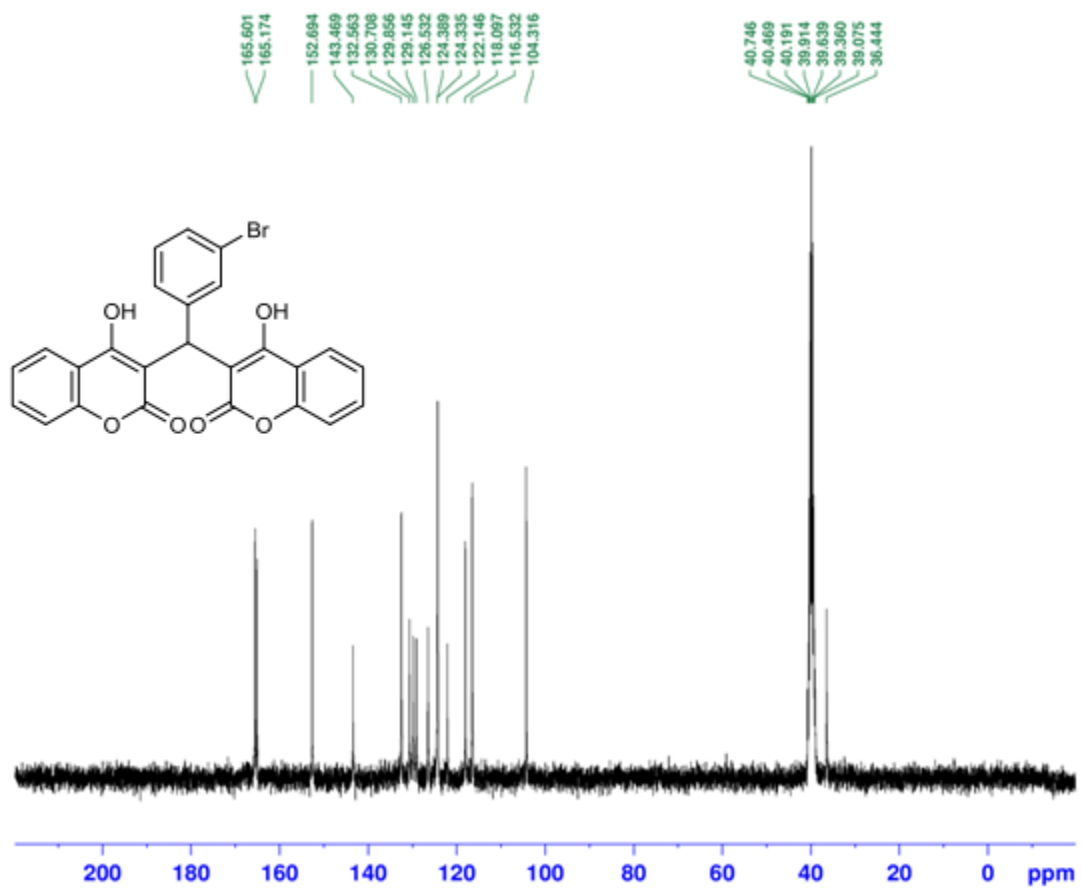

<sup>13</sup>C NMR spectrum of 3,3'-((3-bromophenyl)methylene)bis(4-hydroxy-2H-chromen-2-one) (**4c**).

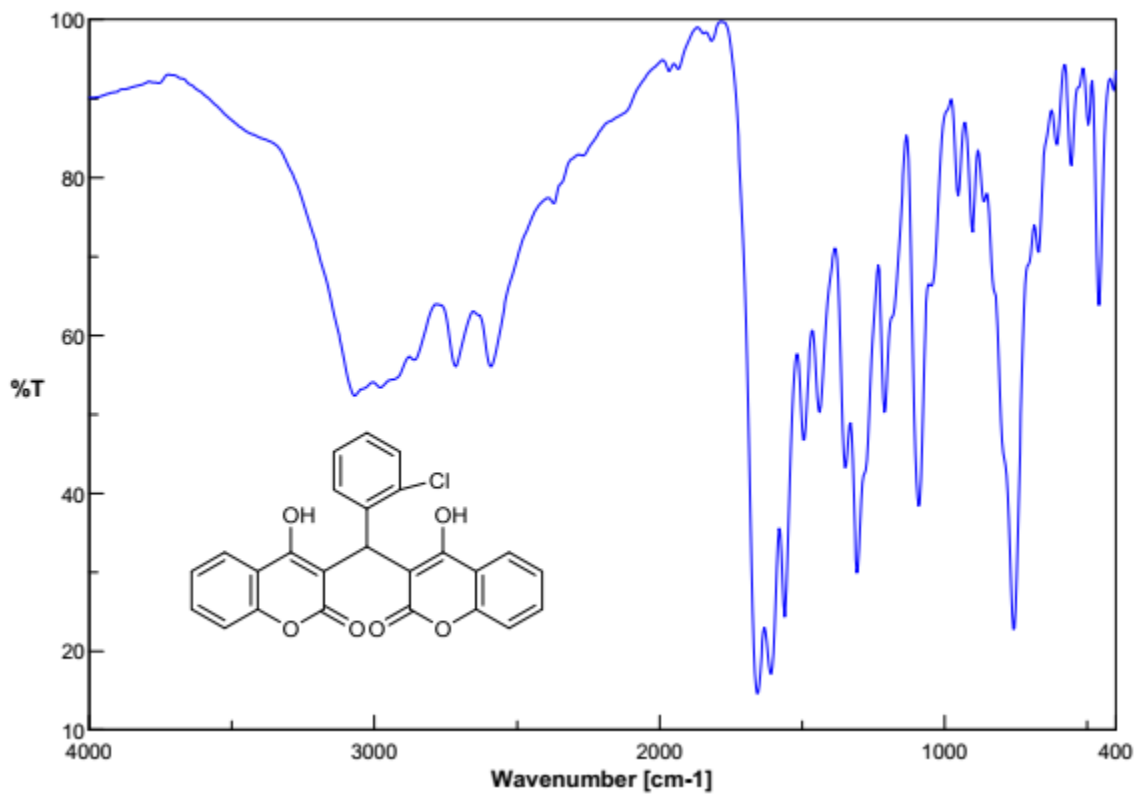

FT-IR spectrum of 3,3'-((2-chlorophenyl)methylene)bis(4-hydroxy-2H-chromen-2-one) (**4d**).

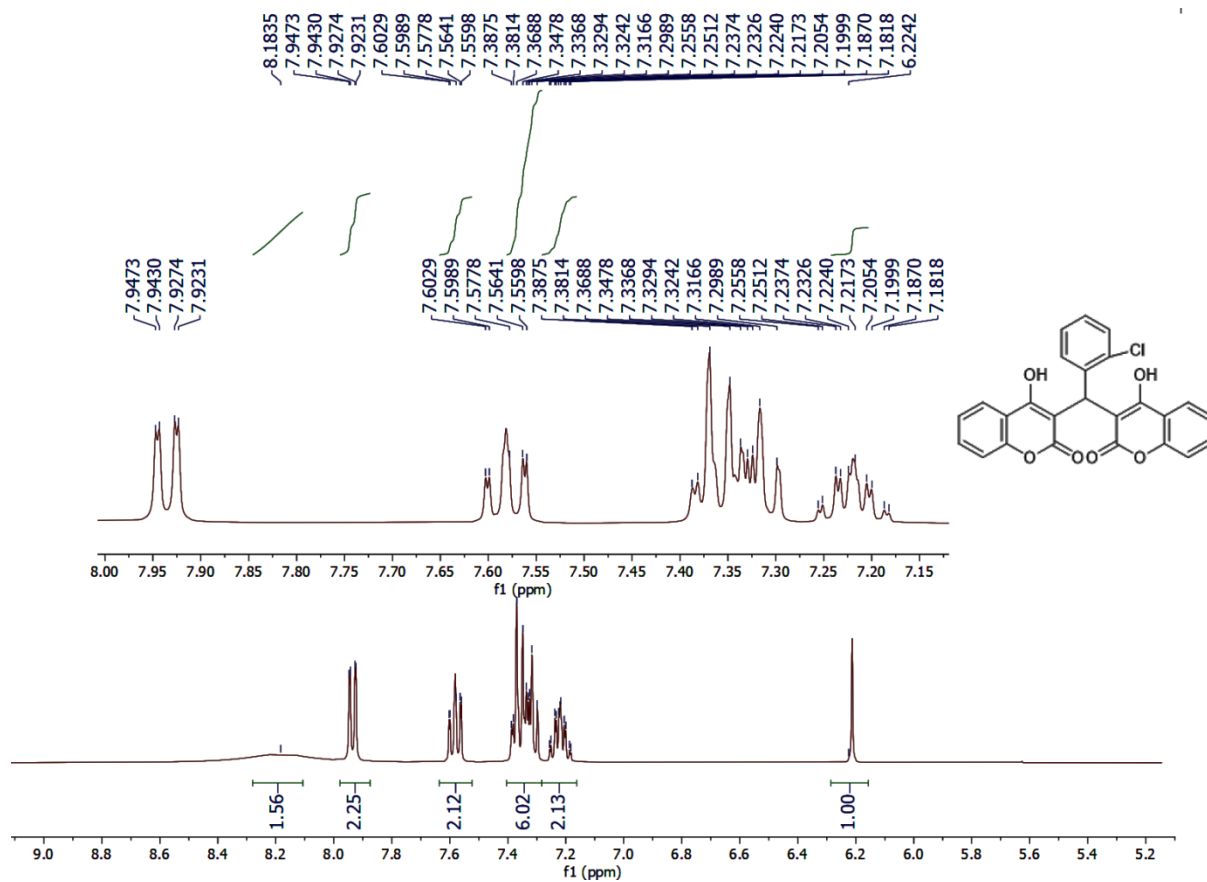

$^1\text{H}$  NMR spectrum of 3,3'-((2-chlorophenyl)methylene)bis(4-hydroxy-2H-chromen-2-one) (**4d**).

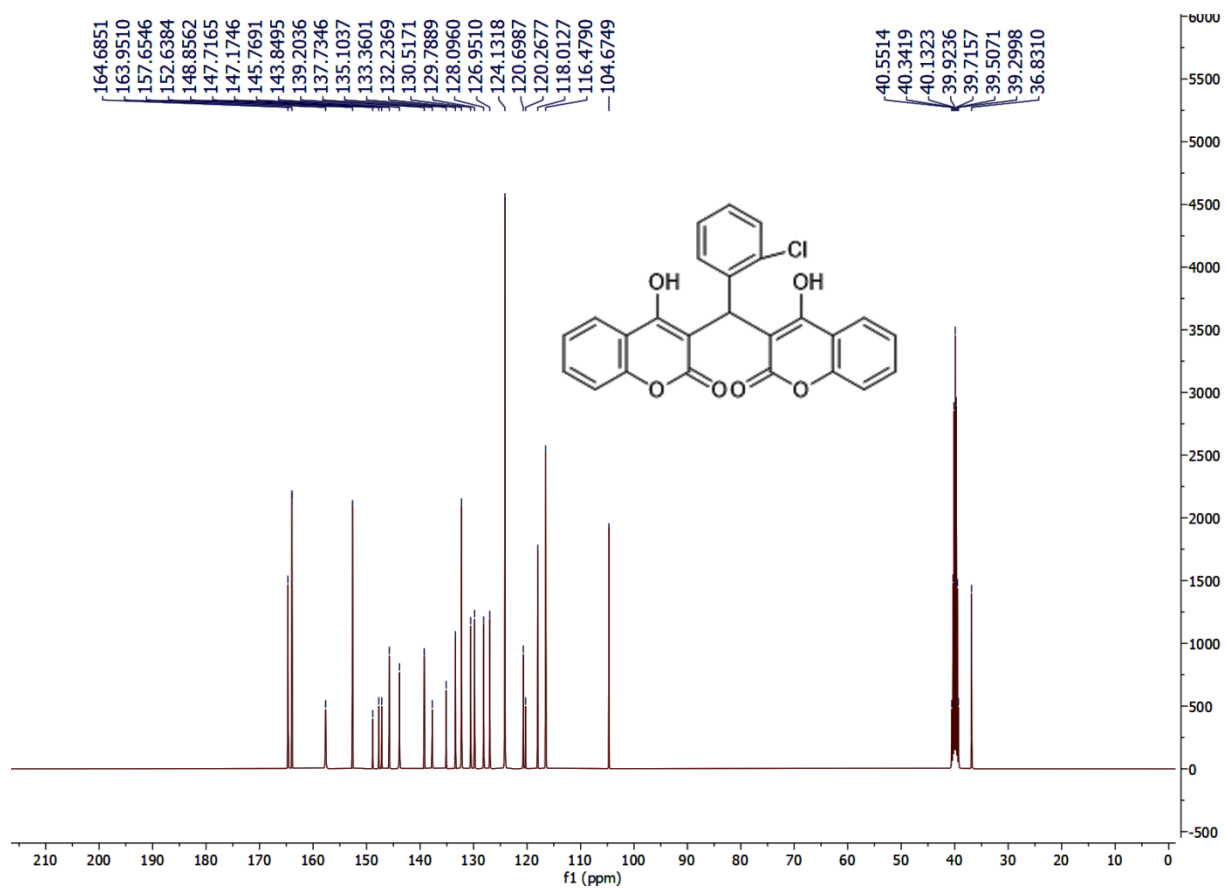

$^{13}\text{C}$  NMR spectrum of 3,3'-((2-chlorophenyl)methylene)bis(4-hydroxy-2H-chromen-2-one) (**4d**).

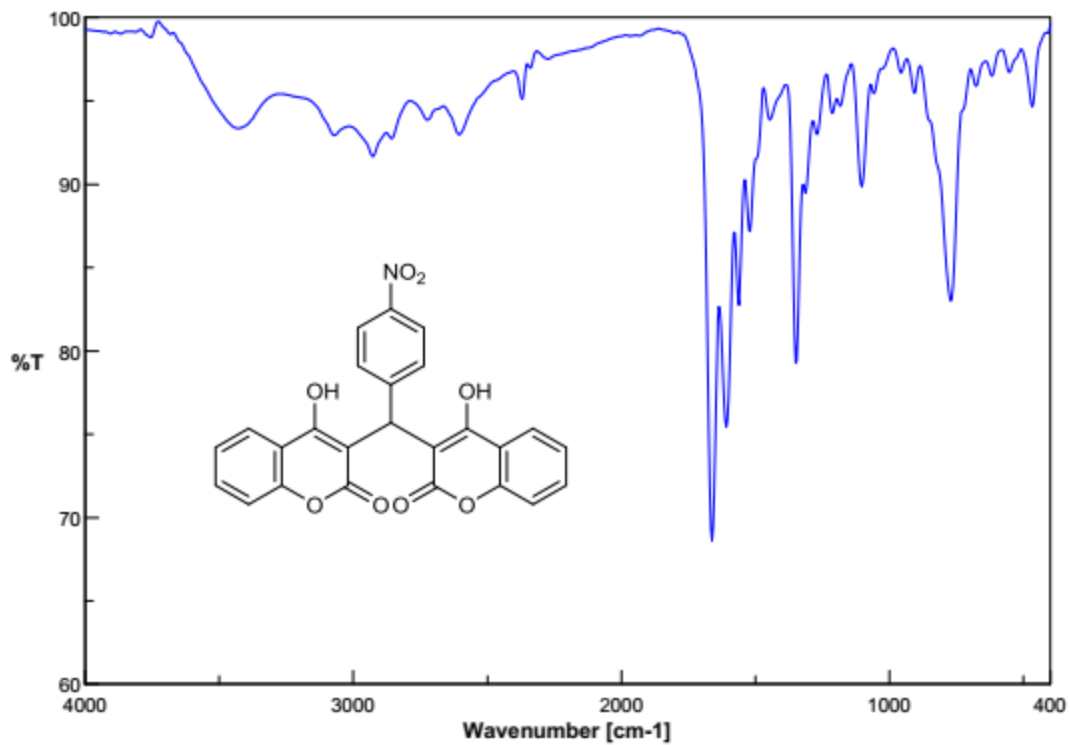

FT-IR spectrum of 3,3'-((4-nitrophenyl)methylene)bis(4-hydroxy-2H-chromen-2-one) (**4e**).

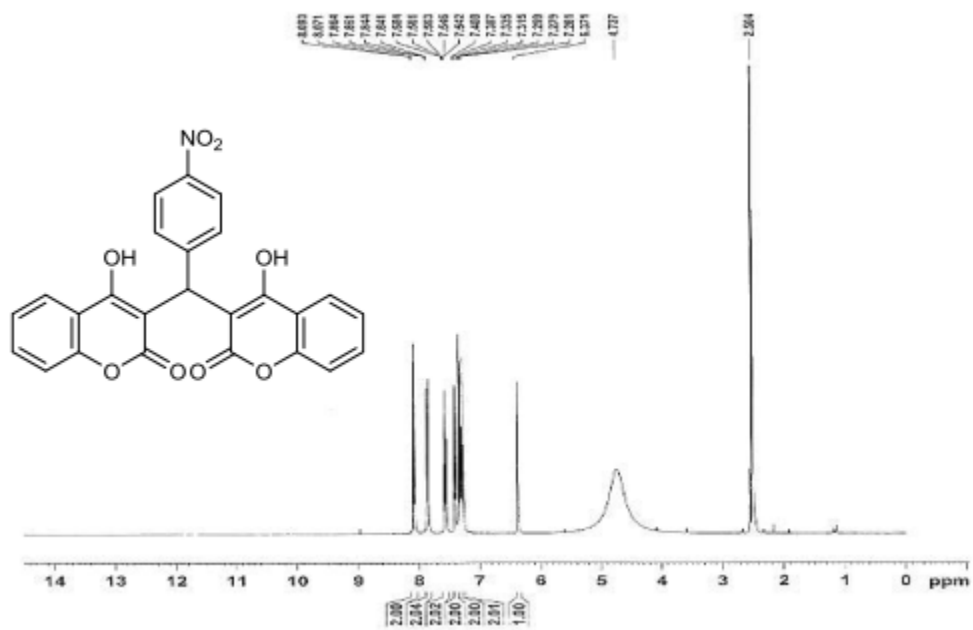

<sup>1</sup>H NMR spectrum of 3,3'-((4-nitrophenyl)methylene)bis(4-hydroxy-2H-chromen-2-one) (**4e**).

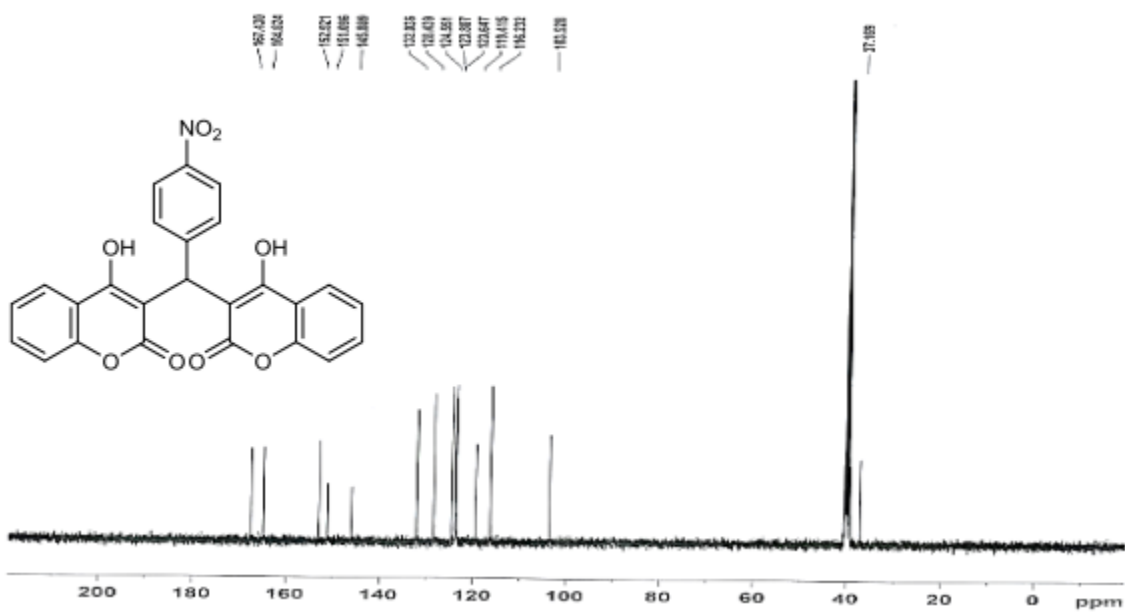

$^{13}\text{C}$  NMR spectrum of 3,3'-((4-nitrophenyl)methylene)bis(4-hydroxy-2H-chromen-2-one) (**4e**).

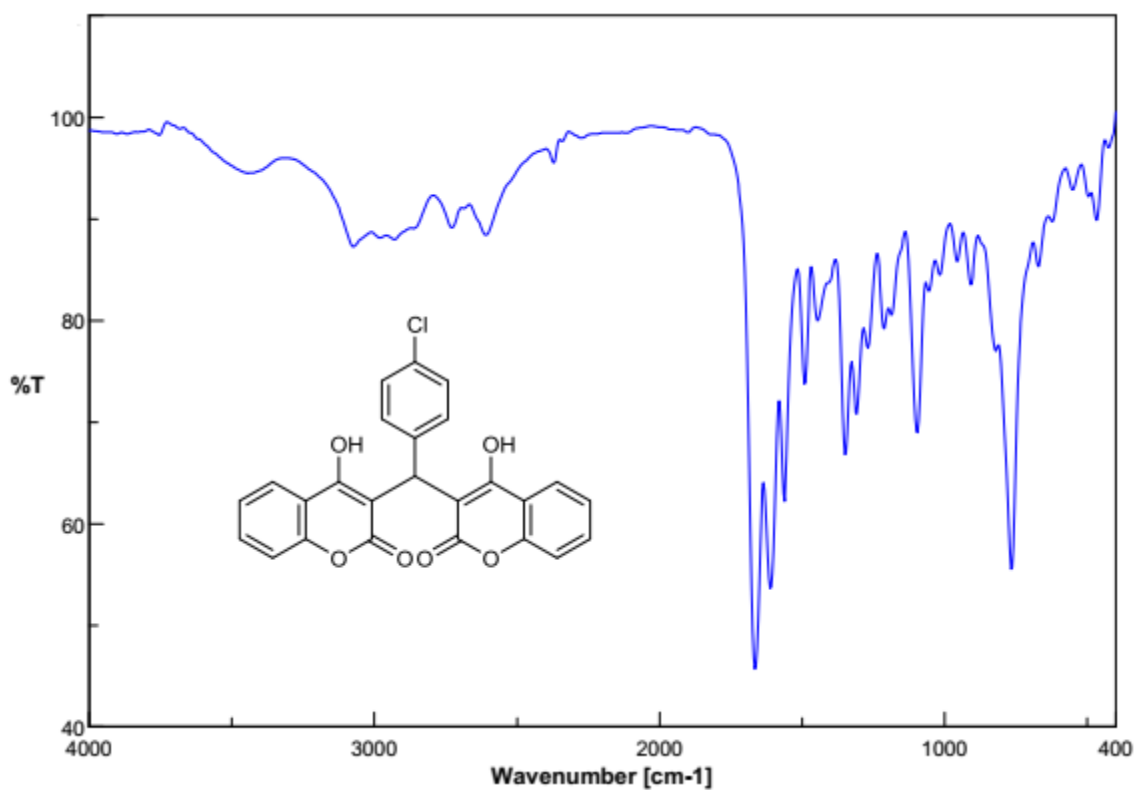

FT-IR spectrum of 3,3'-((4-chlorophenyl)methylene)bis(4-hydroxy-2H-chromen-2-one) (**4f**).

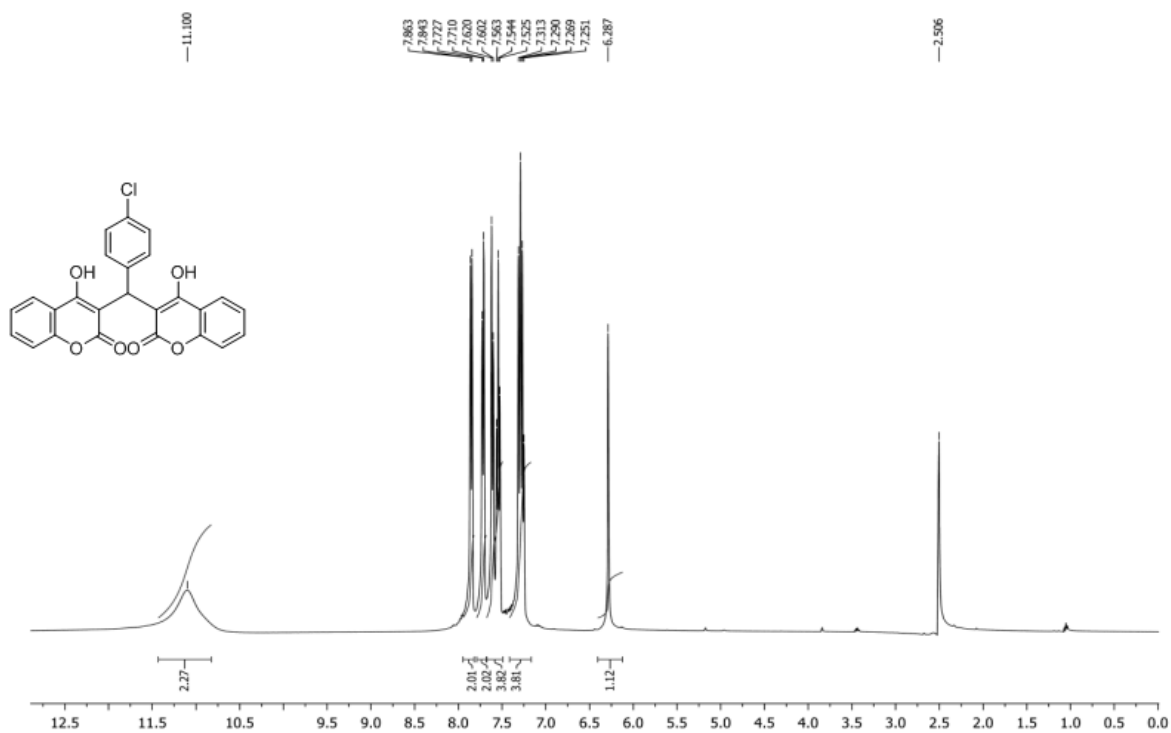

<sup>1</sup>H NMR spectrum of 3,3'-((4-chlorophenyl)methylene)bis(4-hydroxy-2H-chromen-2-one) (**4f**).

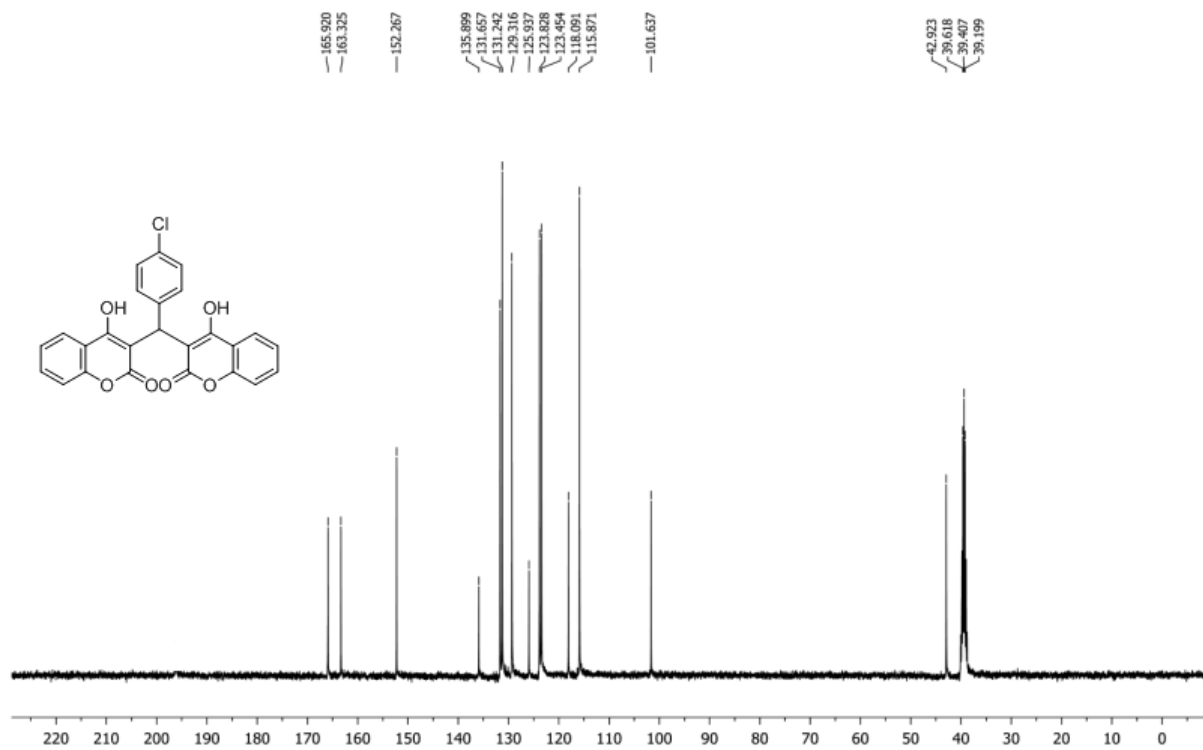

<sup>13</sup>C NMR spectrum of 3,3'-((4-chlorophenyl)methylene)bis(4-hydroxy-2H-chromen-2-one) (**4f**).

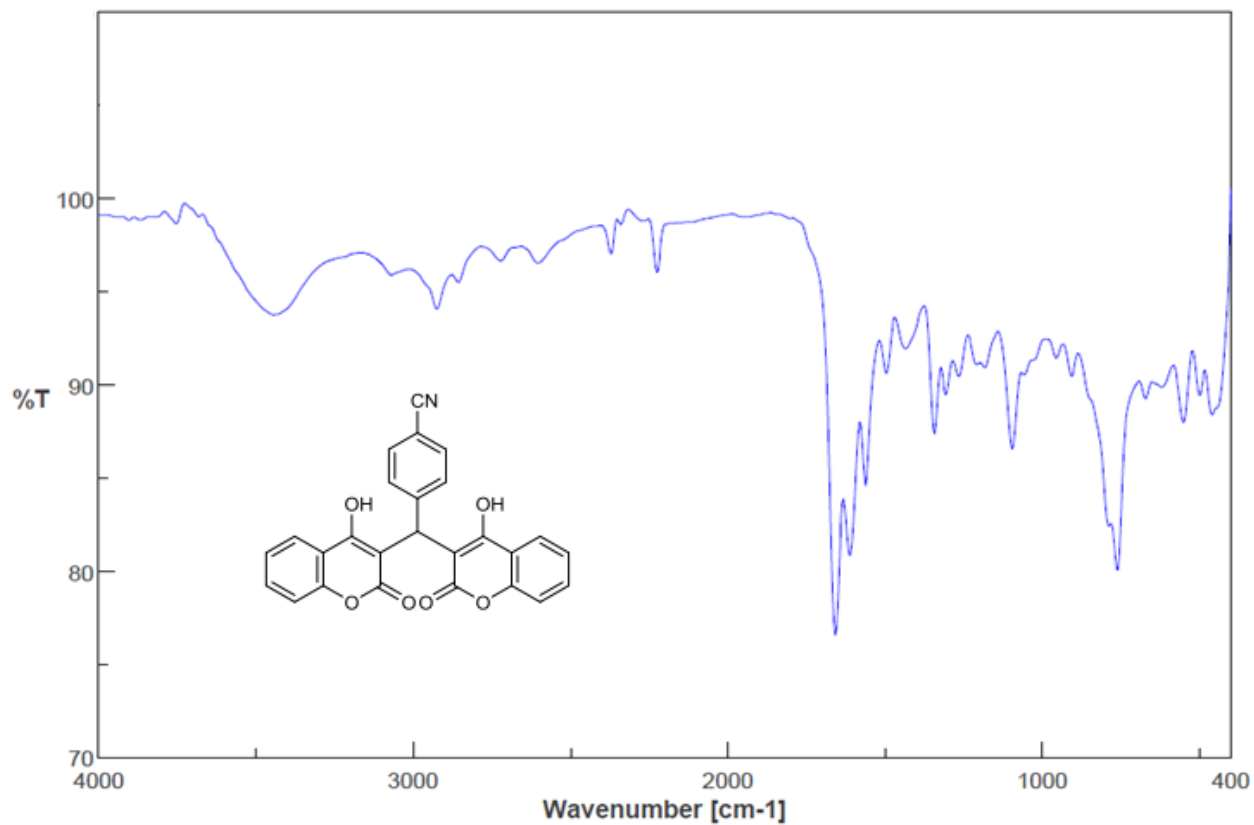

FT-IR spectrum of 4-(bis(4-hydroxy-2-oxo-2H-chromen-3-yl)methyl)benzonitrile (**4g**).



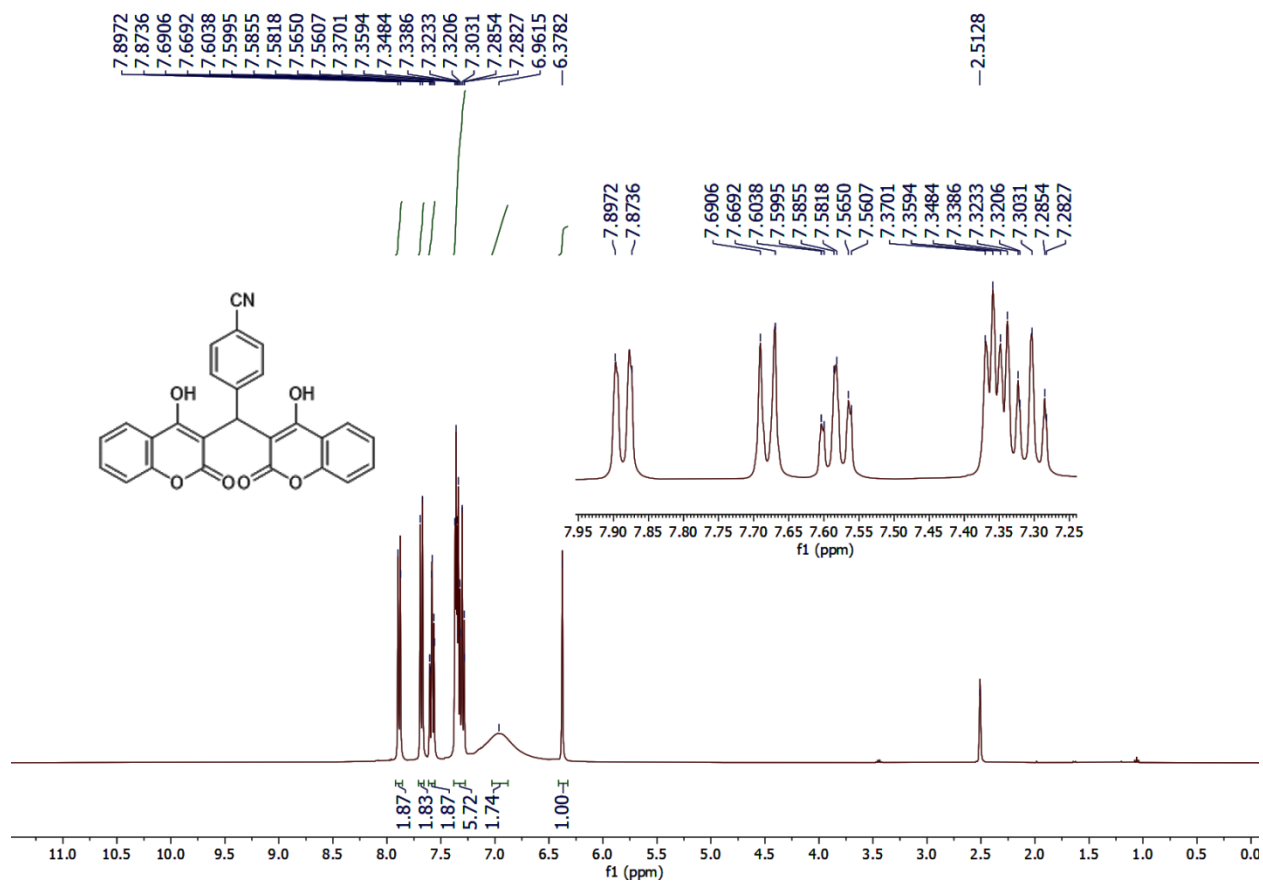

<sup>1</sup>H NMR spectrum of 4-(bis(4-hydroxy-2-oxo-2H-chromen-3-yl)methyl)benzonitrile (**4g**).

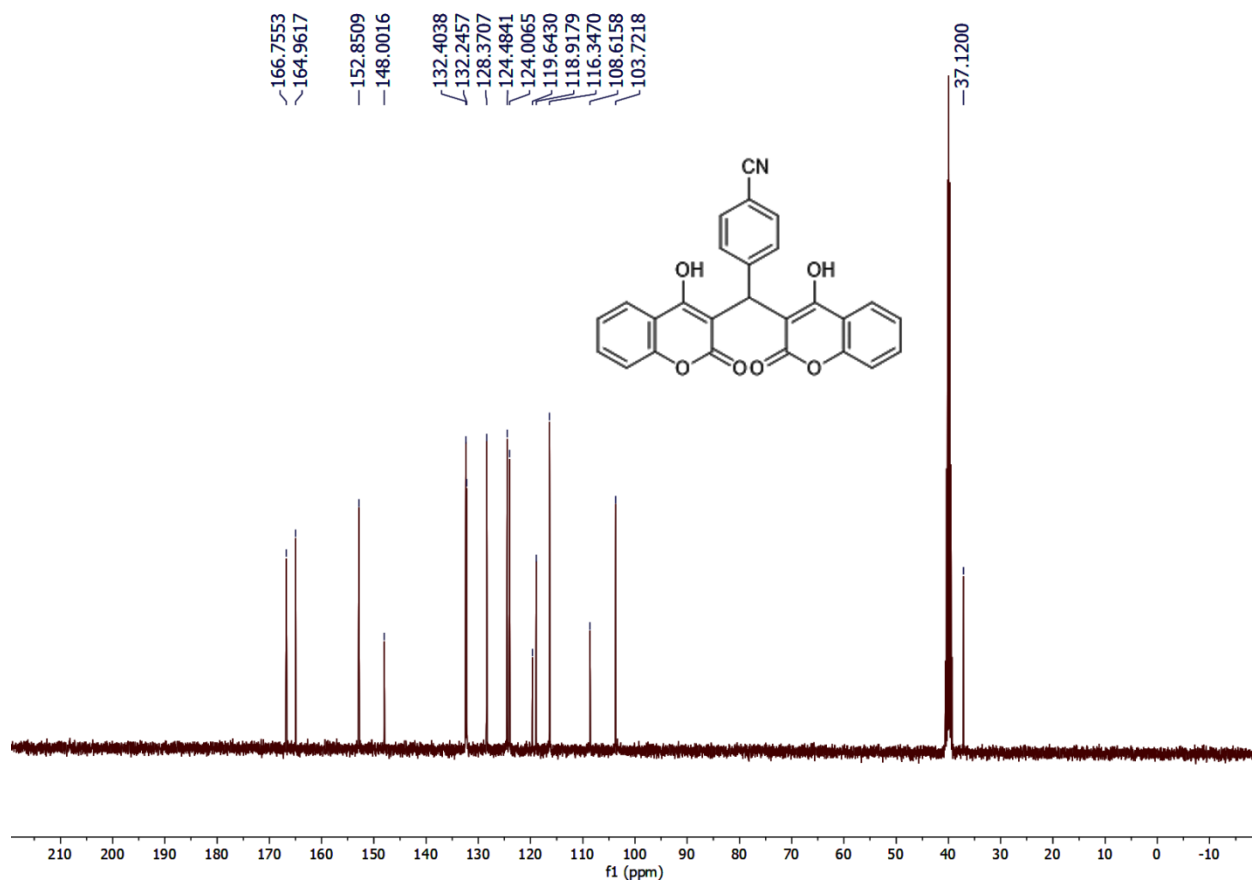

<sup>13</sup>C NMR spectrum of 4-(bis(4-hydroxy-2-oxo-2H-chromen-3-yl)methyl)benzotrile (**4g**).

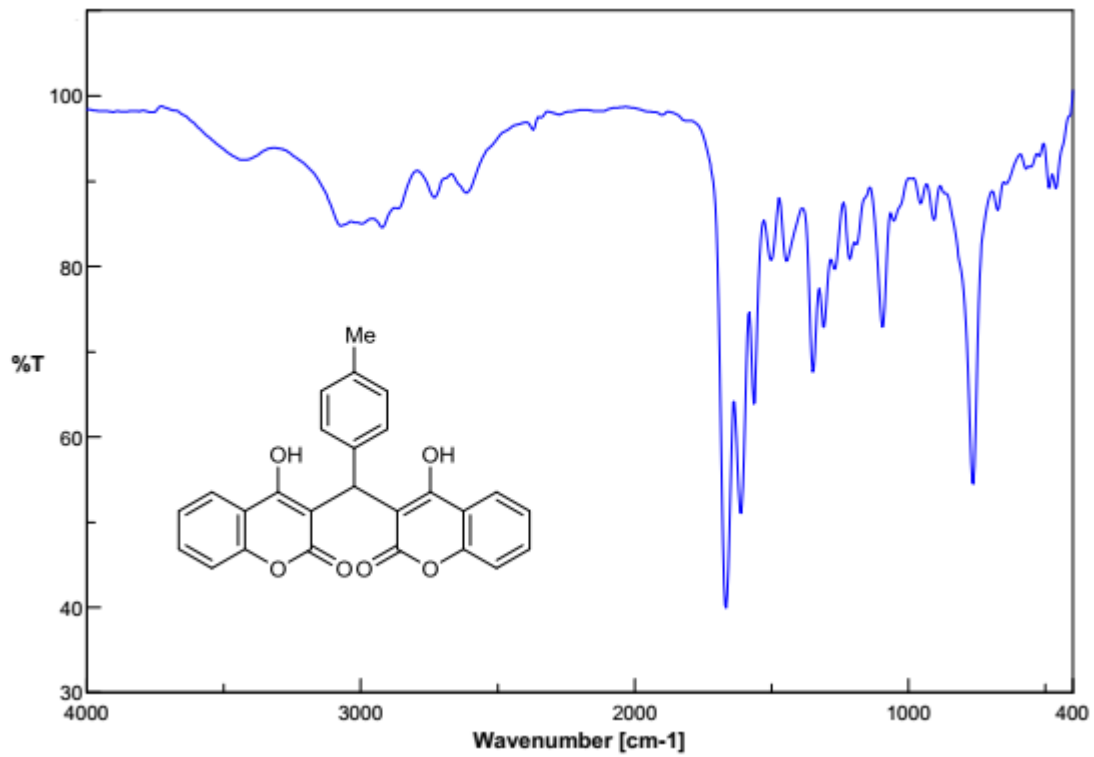

FT-IR spectrum of 3,3'-(p-tolylmethylene)bis(4-hydroxy-2H-chromen-2-one) (**4h**).

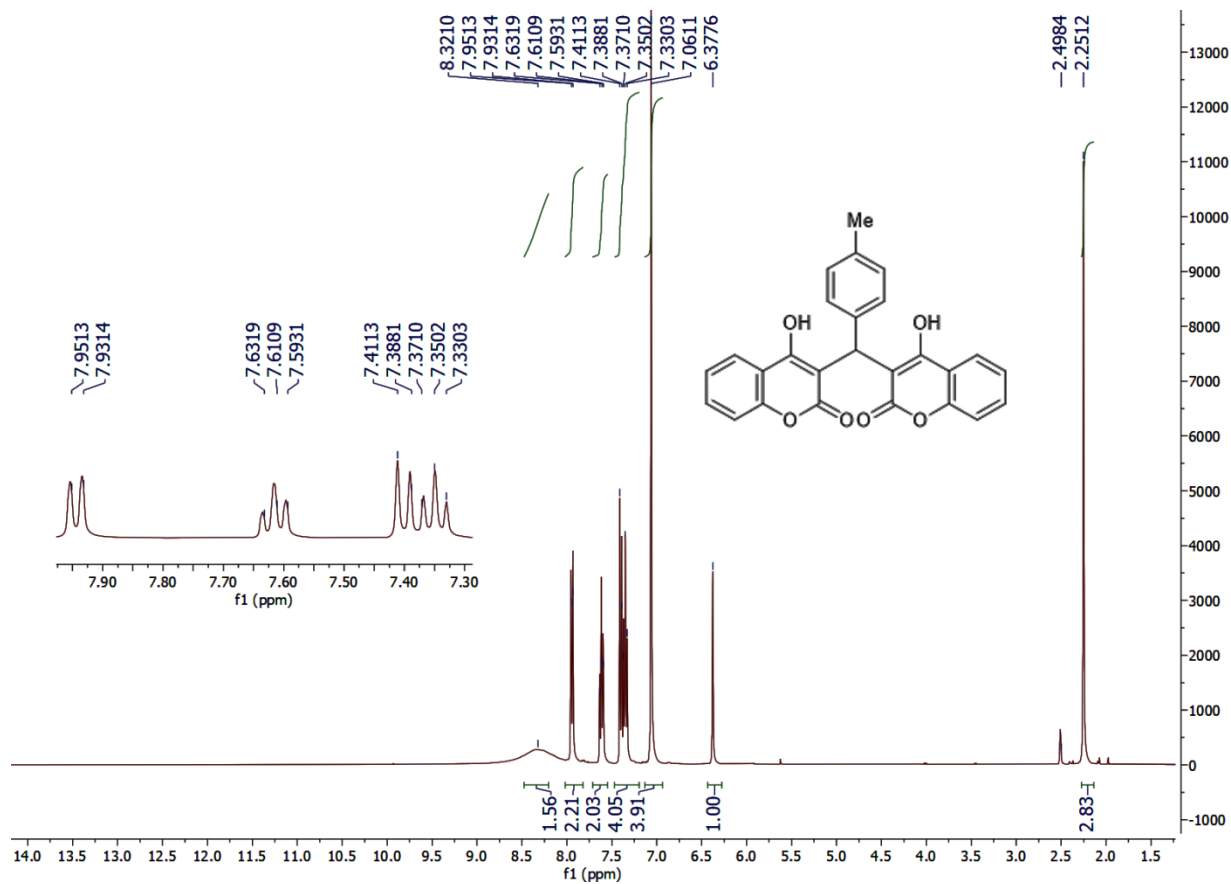

<sup>1</sup>H NMR spectrum of 3,3'-(p-tolylmethylene)bis(4-hydroxy-2H-chromen-2-one) (**4h**).

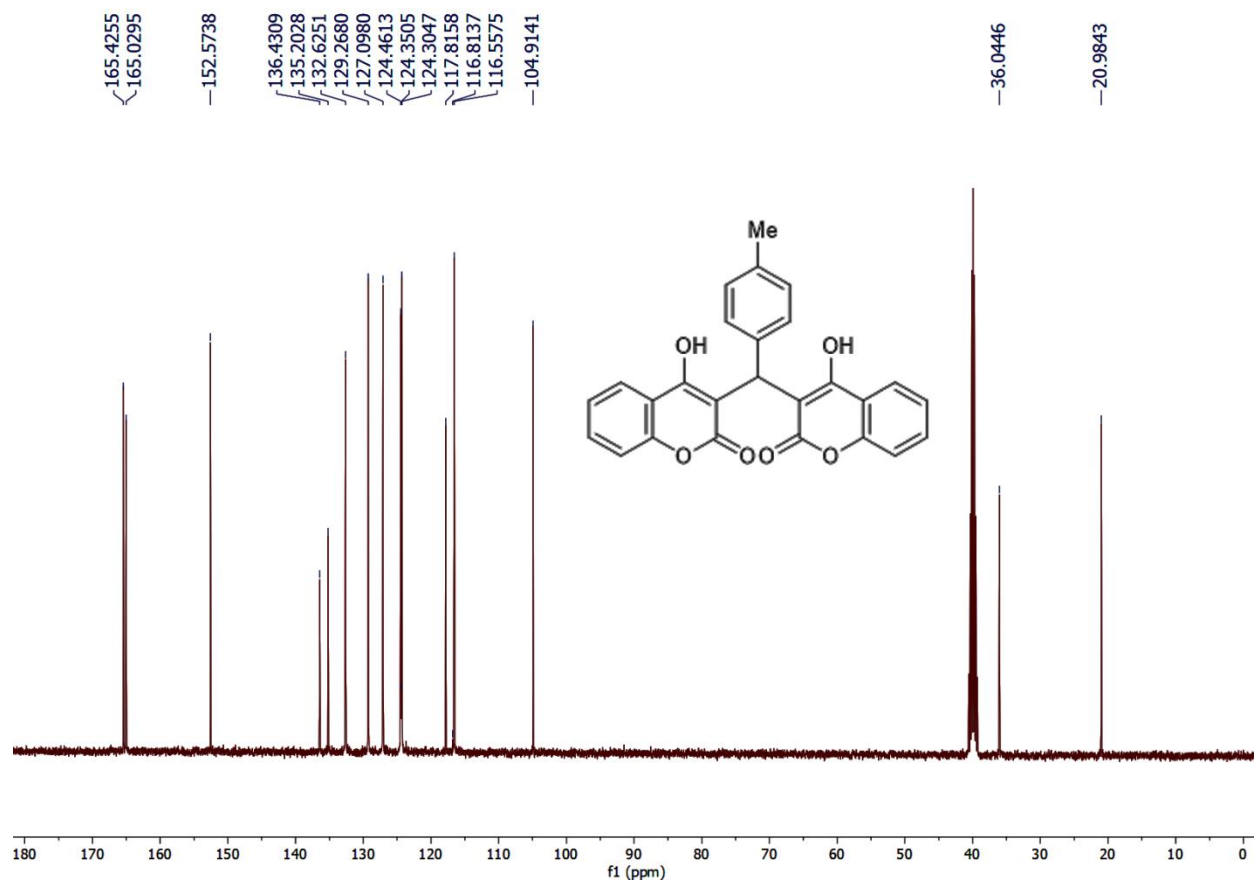

$^{13}\text{C}$  NMR spectrum of 3,3'-(p-tolylmethylene)bis(4-hydroxy-2H-chromen-2-one) (**4h**).

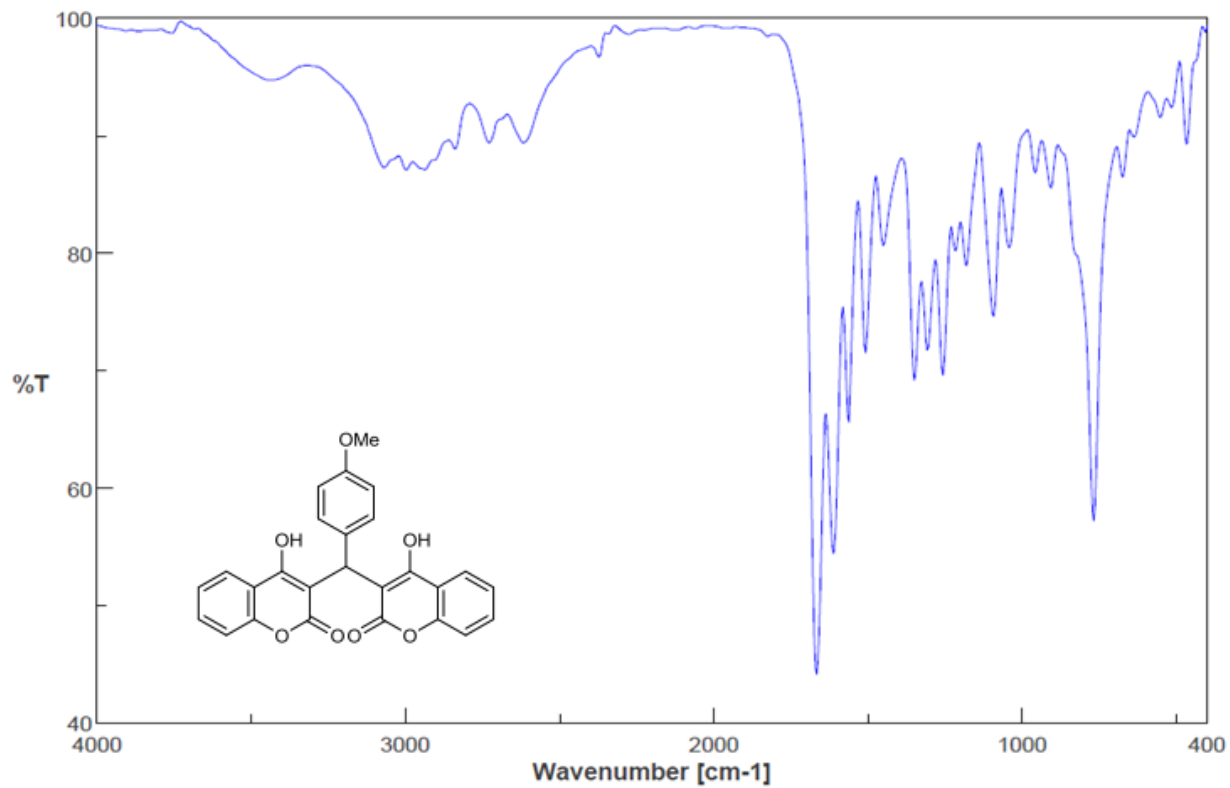

FT-IR spectrum of 3,3'-((4-methoxyphenyl)methylene)bis(4-hydroxy-2H-chromen-2-one) (**4i**).

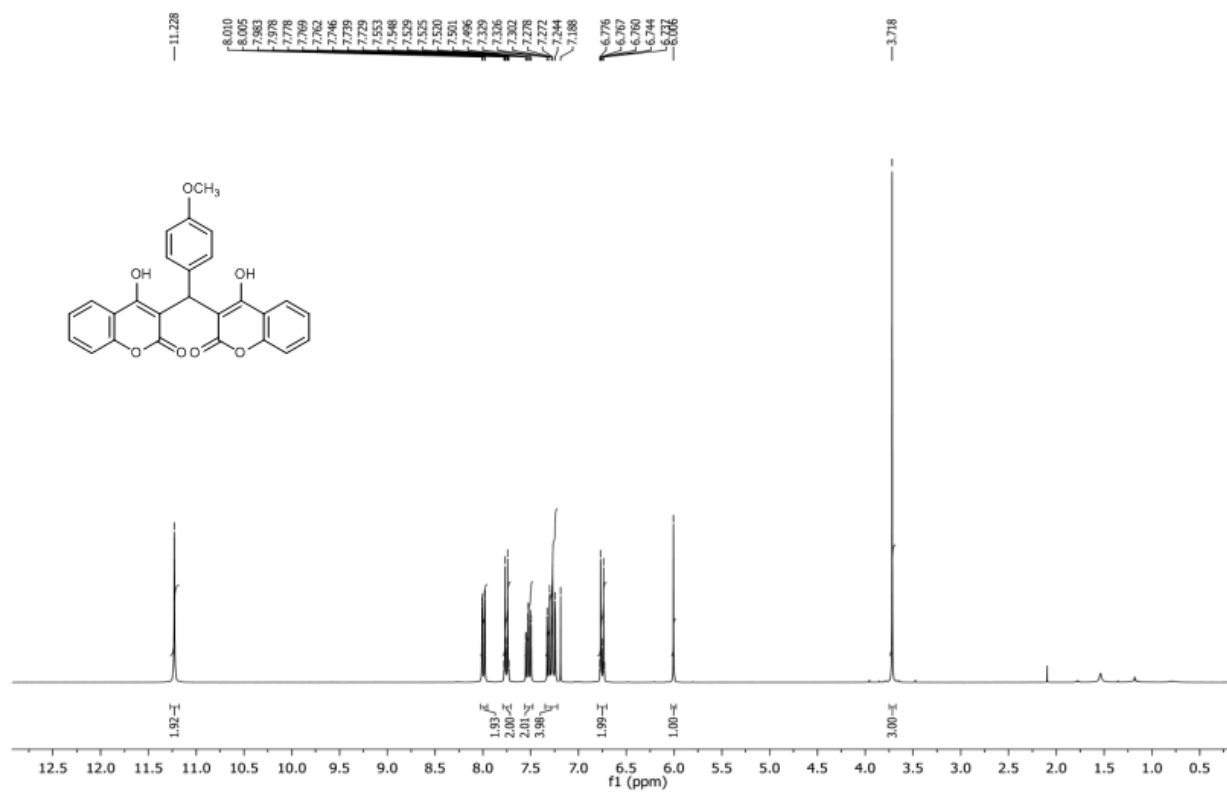

<sup>1</sup>H NMR spectrum of 3,3'-((4-methoxyphenyl)methylene)bis(4-hydroxy-2H-chromen-2-one) (**4i**).

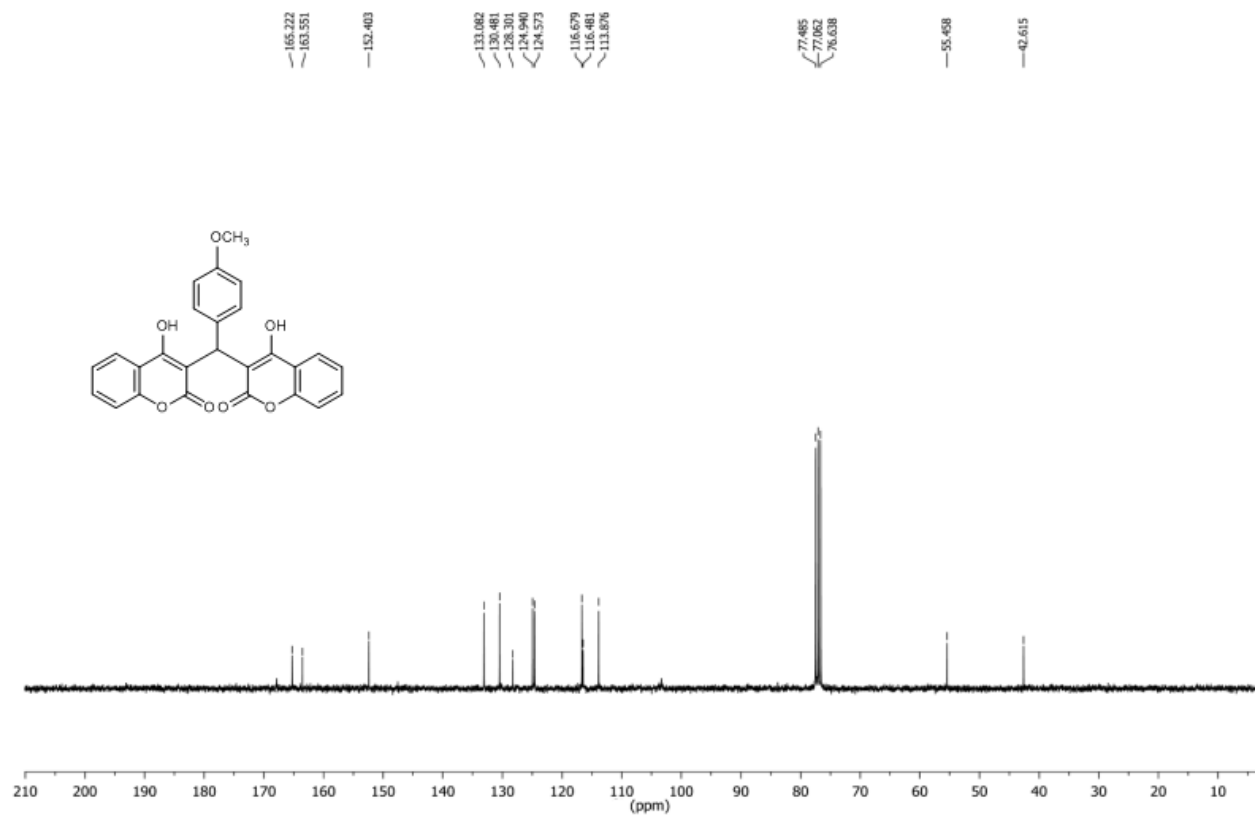

<sup>13</sup>C NMR spectrum of 3,3'-((4-methoxyphenyl)methylene)bis(4-hydroxy-2H-chromen-2-one) (**4i**).

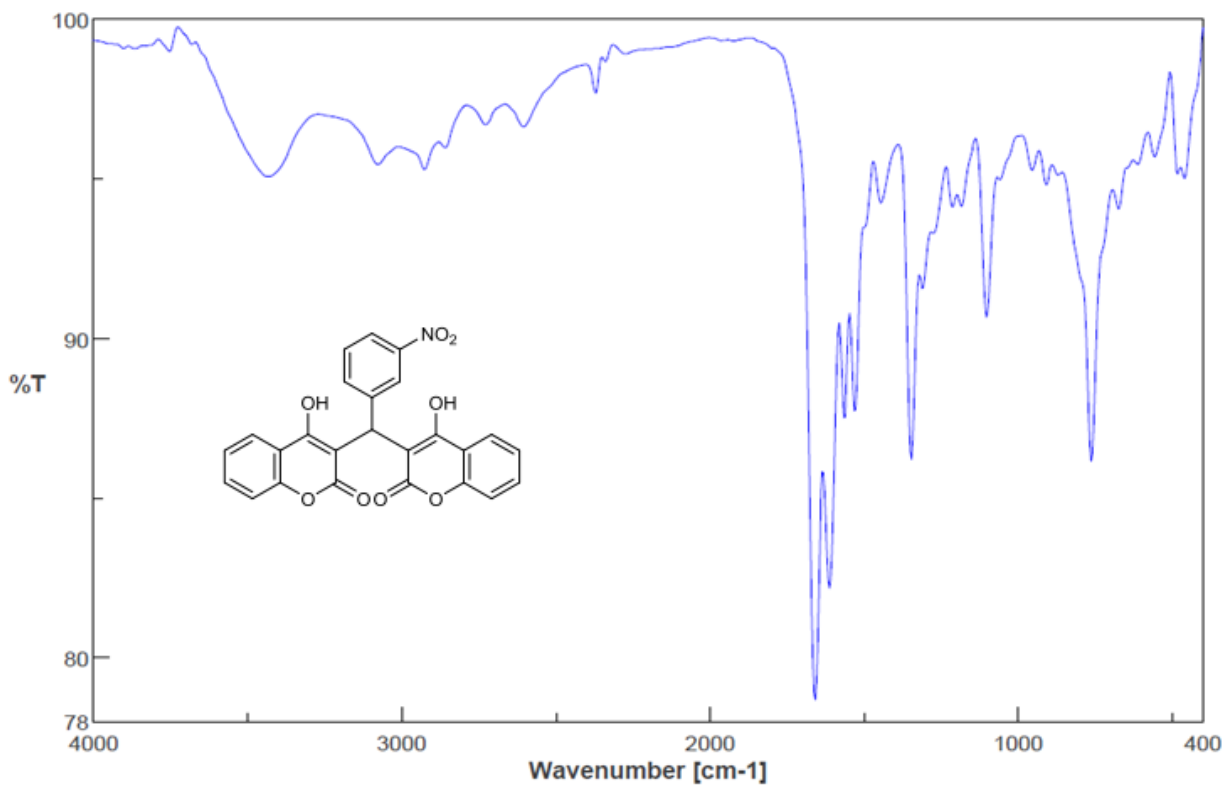



FT-IR spectrum of 3,3'-((3-nitrophenyl)methylene)bis(4-hydroxy-2H-chromen-2-one) (**4j**).

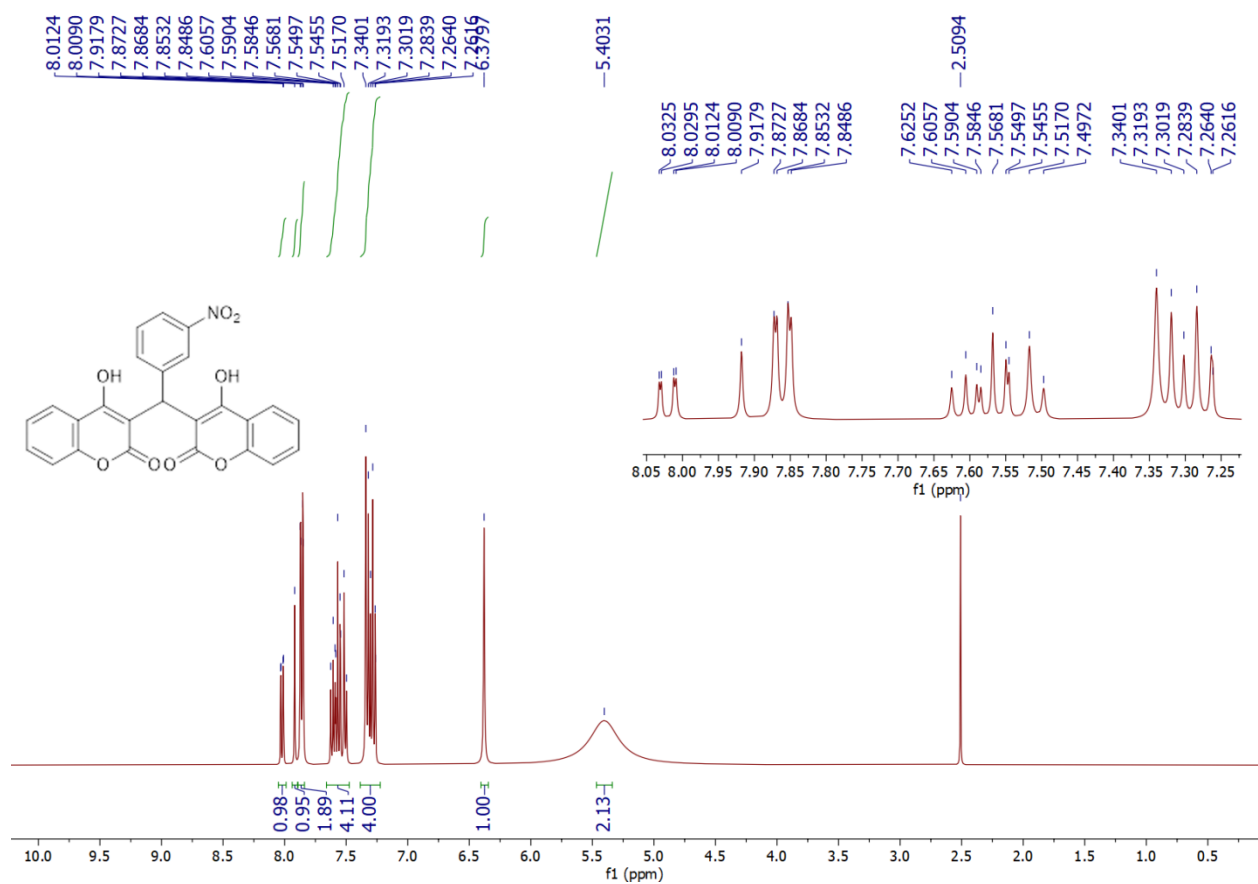

<sup>1</sup>H NMR spectrum of 3,3'-((3-nitrophenyl)methylene)bis(4-hydroxy-2H-chromen-2-one) (**4j**).

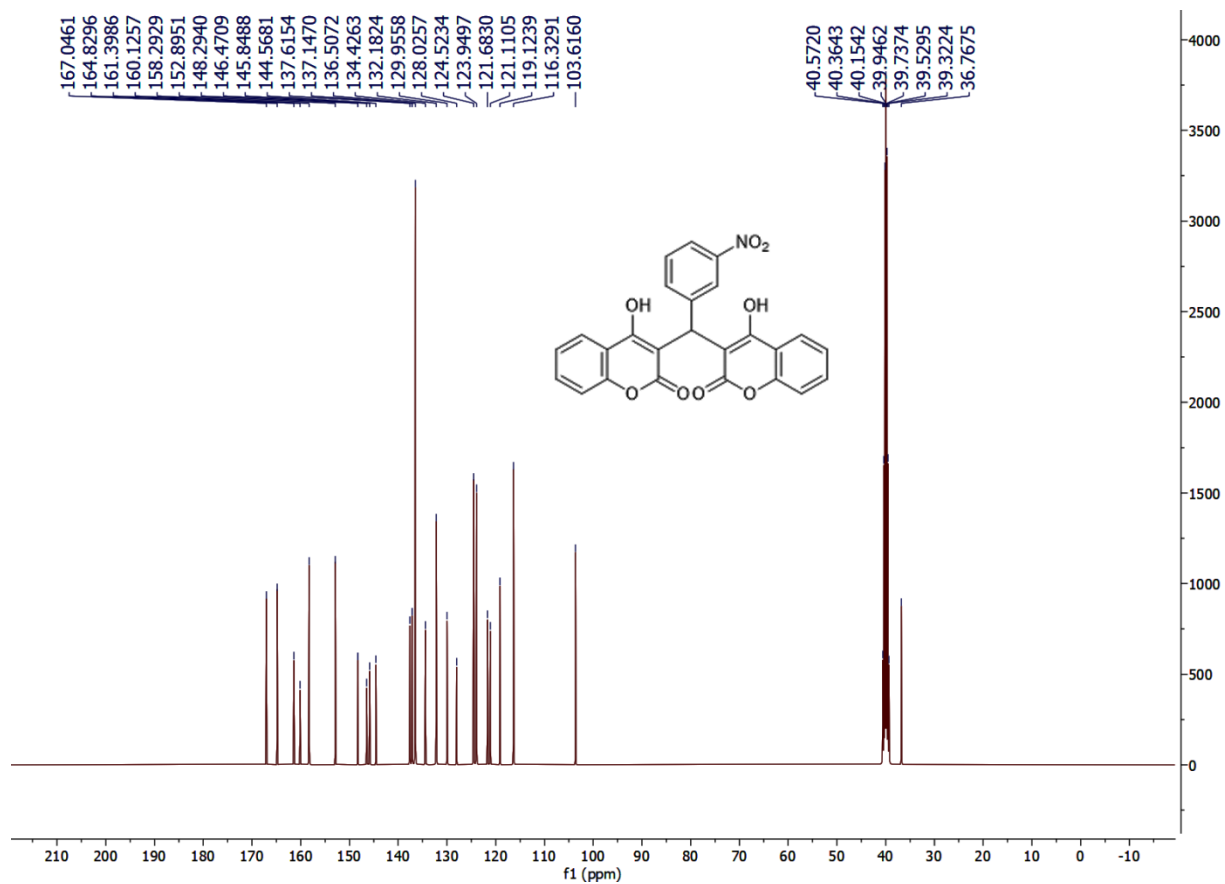

$^{13}\text{C}$  NMR spectrum of 3,3'-(3-nitrophenyl)methylenebis(4-hydroxy-2H-chromen-2-one) (**4j**).
